# Supplementary material
Source: Research Square preprint supplement (doi:10.21203/rs.3.rs-8312169/v1)
Supplement: Supplementary file 1 [file fd5a1bd9496673bb32692dc3.docx]

| **Supplementary Table 1. Comparison of MRI imaging parameters between  training and external validation sets** | | | | |
| --- | --- | --- | --- | --- |
| **Parameter** | **T1WI** | **T2WI a** | **DWI b** | **Contrast-enhanced MRI** |
| **Bandwidth(Hz)** |  |  |  |  |
| Training set | 178 | 260 | 1250 | 401 |
| Validation set | 475 | 650 | 1450 | 445 |
| **FOV(mm)** |  |  |  |  |
| Training set | 370.0 x 370.0 | 370.0 x 370.0 | 300.0 x 255.0 | 400.0 x 312.5 |
| Validation set | 380.6 x 420.0 | 420.0 x 420.0 | 420.0 x 307.3 | 400.0 x 313.9 |
| **Flip angle (degrees)** |  |  |  |  |
| Training set | 150 | 150 | 90 | 10 |
| Validation set | 10 | 159 | 90 | 10 |
| **Pixel Size (mm)** |  |  |  |  |
| Training set | 0.6 x 0.6 | 1.4 x 1.4 | 0.9 x 0.9 | 1.3 x 1.3 |
| Validation set | 1.3 x 1.3 | 1.1 x 1.1 | 1.3 x 1.3 | 1.4 x 1.4 |
| **Sequence type** |  |  |  |  |
| Training set | SE | SE | EP | GR |
| Validation set | GR | SE | EP | GR |
| **Slices** |  |  |  |  |
| Training set | 30 | 30 | 15 | 40 |
| Validation set | 56 | 26 | 26 | 64 |
| **TR/TE(msec)** |  |  |  |  |
| Training set | 448/10 | 5710/83 | 2700/83 | 4.89/2.38 |
| Validation set | 6.8/2.39 | 2300/90 | 4800/81 | 3.56/1.39 |
| **Thickness/Gap(mm)** |  |  |  |  |
| Training set | 4/1.2 | 4/1.4 | 5/1.5 | 4/0 |
| Validation set | 3.5/0 | 6/1.2 | 6/1.2 | 3/0 |
| a The T2WI protocol for the training set was Fat-Suppressed (FS)-T2WI, while the protocol for the validation set was Dixon-T2WI. b The DWI protocol for the training set used a b-value of 1000 s/mm², while the protocol for the validation set used a b-value of 800 s/mm².  Abbreviations: DWI, diffusion-weighted imaging; EP, echo planar; FOV, field of view; FS, fat-suppressed; GR, gradient echo;MRI, magnetic resonance imaging; SE, spin echo; T1WI, T1-weighted imaging; T2WI, T2-weighted imaging; TE, echo time; TR, repetition time. | | | | |

Supplementary Table 2. ADC Histogram Metrics for Differentiating Cellular Leiomyoma and Endometrial Stromal Sarcoma

| **Characteristic** | **Overall** a  N = 111 | **CL** a  N = 70 | **ESS** a   N = 41 | **P value** b |
| --- | --- | --- | --- | --- |
| Minimum ADC | 0.63 ± 0.21 | 0.64 ± 0.20 | 0.62 ± 0.22 | 0.60 |
| Mean ADC | 1.09 (0.92, 1.21) | 1.14 (1.01, 1.31) | 0.99 (0.87, 1.10) | **<0.01** |
| Maximum ADC | 1.85 ± 0.46 | 1.96 ± 0.44 | 1.67 ± 0.43 | **<0.01** |
| ADC 10th Percentile | 0.90 (0.78, 1.03) | 0.94 (0.81, 1.07) | 0.83 (0.71, 0.94) | **<0.01** |
| ADC 25th Percentile | 0.98 (0.83, 1.10) | 1.02 (0.89, 1.16) | 0.87 (0.80, 1.00) | **<0.01** |
| ADC 50th Percentile | 1.07 (0.91, 1.19) | 1.12 (0.97, 1.31) | 0.97 (0.85, 1.09) | **<0.01** |
| ADC 75th Percentile | 1.18 (0.98, 1.34) | 1.25 (1.10, 1.40) | 1.04 (0.93, 1.19) | **<0.01** |
| ADC 90th Percentile | 1.31 (1.08, 1.46) | 1.40 (1.20, 1.56) | 1.14 (1.00, 1.30) | **<0.01** |
| ADC Skewness | 0.69 ± 0.60 | 0.66 ± 0.44 | 0.74 ± 0.80 | 0.60 |
| ADC Kurtosis | 0.78 (0.15, 1.96) | 0.67 (0.20, 1.24) | 0.92 (0.07, 3.01) | 0.30 |

| a ADC metrics are summarized as mean ± SD when both groups are normally distributed (Shapiro–Wilk p ≥ 0.05), otherwise as median (IQR). b P values: Welch’s t-test for variables normal in both groups; Wilcoxon rank-sum test otherwise. Normality assessed by Shapiro–Wilk within groups (CL n = 70; ESS n = 41).  Abbreviations: ADC, apparent diffusion coefficient (×10⁻³ mm²/s); CL, cellular leiomyoma; ESS, endometrial stromal sarcoma; IQR, interquartile range.  Bold values indicate statistical significance (p < 0.05). |
| --- |

Supplementary Table 3. Comparison of Significant Features Between CL and ESS in the Training and Validation Cohorts

|  | **Training Set** | | | **External Validation Set** | | |
| --- | --- | --- | --- | --- | --- | --- |
| **Characteristic** | **CL (n=70)** | **ESS (n=41)** | **P-value** | **CL (n=28)** | **ESS (n=16)** | **P-value** |
| Cystic Area | 9 (12.9%) | 13 (31.7%) | 0.03 | 5 (17.9%) | 11 (68.8%) | <0.01 |
| Margin | 17 (24.3%) | 27 (65.9%) | <0.001 | 4 (14.3%) | 7 (43.8%) | 0.07 |
| Mean ADC | 1.150±0.204 | 1.004±0.204 | <0.001 | 1.157±0.242 | 1.027±0.146 | 0.03 |

| Data are presented as n (%) or mean ± standard deviation (SD). P-values were calculated using the Chi-square test (or Fisher's exact test) for categorical variables and the Mann-Whitney U test for continuous variables.  Abbreviations: ADC, apparent diffusion coefficient; CL, cellular leiomyoma; ESS, endometrial stromal sarcoma; SD, standard deviation. |
| --- |
|  |
|  |
